# Supplementary material for: The cholesterol transporter NPC1 is essential for epigenetic regulation and maturation of oligodendrocyte lineage cells
Source: PubMed Central journal article supplement (PMC10322873; doi:10.1038/s41467-023-39733-6), 2023-07-05
Supplement: 41467_2023_39733_MOESM3_ESM.pdf [file 41467_2023_39733_MOESM3_ESM.pdf]

## **Description of additional supplementary files**

Supplementary Data 1 : Differentially expressed genes for the oligodendrocyte lineage from snRNA-seq. Fold change is expression in *Npc1*<sup>-/-</sup> cells relative to WT.

Supplementary Data 2 : GO analysis in oligodendrocyte lineage cells. GO: Biological Process was performed on the differentially expressed genes detected by snRNA-seq.
