# Supplementary material for: The cholesterol transporter NPC1 is essential for epigenetic regulation and maturation of oligodendrocyte lineage cells
Source: PubMed Central journal article supplement (PMC10322873; doi:10.1038/s41467-023-39733-6), 2023-07-05
Supplement: 41467_2023_39733_MOESM6_ESM.pdf [file 41467_2023_39733_MOESM6_ESM.pdf]

## Reporting Summary

Nature Portfolio wishes to improve the reproducibility of the work that we publish. This form provides structure for consistency and transparency in reporting. For further information on Nature Portfolio policies, see our [Editorial Policies](#) and the [Editorial Policy Checklist](#).

### Statistics

For all statistical analyses, confirm that the following items are present in the figure legend, table legend, main text, or Methods section.

- | n/a                                 | Confirmed                                                                                                                                                                                                                                                                                      |
|-------------------------------------|------------------------------------------------------------------------------------------------------------------------------------------------------------------------------------------------------------------------------------------------------------------------------------------------|
| <input type="checkbox"/>            | <input checked="" type="checkbox"/> The exact sample size ( $n$ ) for each experimental group/condition, given as a discrete number and unit of measurement                                                                                                                                    |
| <input type="checkbox"/>            | <input checked="" type="checkbox"/> A statement on whether measurements were taken from distinct samples or whether the same sample was measured repeatedly                                                                                                                                    |
| <input type="checkbox"/>            | <input checked="" type="checkbox"/> The statistical test(s) used AND whether they are one- or two-sided<br><i>Only common tests should be described solely by name; describe more complex techniques in the Methods section.</i>                                                               |
| <input type="checkbox"/>            | <input checked="" type="checkbox"/> A description of all covariates tested                                                                                                                                                                                                                     |
| <input type="checkbox"/>            | <input checked="" type="checkbox"/> A description of any assumptions or corrections, such as tests of normality and adjustment for multiple comparisons                                                                                                                                        |
| <input type="checkbox"/>            | <input checked="" type="checkbox"/> A full description of the statistical parameters including central tendency (e.g. means) or other basic estimates (e.g. regression coefficient) AND variation (e.g. standard deviation) or associated estimates of uncertainty (e.g. confidence intervals) |
| <input type="checkbox"/>            | <input checked="" type="checkbox"/> For null hypothesis testing, the test statistic (e.g. $F$ , $t$ , $r$ ) with confidence intervals, effect sizes, degrees of freedom and $P$ value noted<br><i>Give <math>P</math> values as exact values whenever suitable.</i>                            |
| <input checked="" type="checkbox"/> | <input type="checkbox"/> For Bayesian analysis, information on the choice of priors and Markov chain Monte Carlo settings                                                                                                                                                                      |
| <input checked="" type="checkbox"/> | <input type="checkbox"/> For hierarchical and complex designs, identification of the appropriate level for tests and full reporting of outcomes                                                                                                                                                |
| <input checked="" type="checkbox"/> | <input type="checkbox"/> Estimates of effect sizes (e.g. Cohen's $d$ , Pearson's $r$ ), indicating how they were calculated                                                                                                                                                                    |

*Our web collection on [statistics for biologists](#) contains articles on many of the points above.*

### Software and code

Policy information about [availability of computer code](#)

|                 |                                                                                                                                                                                                                                                                                                                                                                                                                                                                                                                                                                                                                                                                                                                                                                                                                              |
|-----------------|------------------------------------------------------------------------------------------------------------------------------------------------------------------------------------------------------------------------------------------------------------------------------------------------------------------------------------------------------------------------------------------------------------------------------------------------------------------------------------------------------------------------------------------------------------------------------------------------------------------------------------------------------------------------------------------------------------------------------------------------------------------------------------------------------------------------------|
| Data collection | Whole brain saggittal sections were captured using ZEN 2 v2.0.0.0. Confocal images were captured using NIS-Elements AR v5.02.01. qRT-PCR data was gathered using 7500 Software v2.3. Western blot images were captured using iBright software v1.7.0.                                                                                                                                                                                                                                                                                                                                                                                                                                                                                                                                                                        |
| Data analysis   | <p>The following were used in the processing and analysis of bulk RNA-seq data: BCL Convert Conversion Software v3.9.3 (Illumina), FastQC v0.11.9, MultiQC v1.12, STAR aligner v2.7.9a, MultiQC v1.12, R v4.1.1.</p> <p>The following were used in the processing and analysis of snRNA-seq data: STARsolo aligner v2.7.9a, MultiQC v1.12, Seurat v4.1.0, R v4.1.1, ggplot2 v3.3.6</p> <p>The following were used in the processing and analysis of ChIP-seq data: MACS2 v2.2.7.1, SICER v1.1, ngsploT v2.61, IGV v2.15.1</p> <p>GraphPad Prism 9.0 was used for all t-test and ANOVA analyses.</p> <p>ImageJ 1.52q was used in measuring western blot band intensity and in measuring g-ratios from TEM images. CellProfiler 4.0.1 was used to quantify cell counts and staining intensity in immunofluorescent images.</p> |

For manuscripts utilizing custom algorithms or software that are central to the research but not yet described in published literature, software must be made available to editors and reviewers. We strongly encourage code deposition in a community repository (e.g. GitHub). See the Nature Portfolio [guidelines for submitting code & software](#) for further information.

## Data

Policy information about [availability of data](#)

All manuscripts must include a [data availability statement](#). This statement should provide the following information, where applicable:

- Accession codes, unique identifiers, or web links for publicly available datasets
- A description of any restrictions on data availability
- For clinical datasets or third party data, please ensure that the statement adheres to our [policy](#)

The data and materials supporting the findings of this study are available from the corresponding authors upon reasonable request. The raw ChIP-seq, snRNA-seq, and bulk RNA-seq data have been submitted deposited into the GEO database under the series accession code GSE221610 [<https://www.ncbi.nlm.nih.gov/geo/query/acc.cgi?acc=GSE221610>]. Sequence alignment was done using the mouse reference genome GRCm38 [[https://www.ncbi.nlm.nih.gov/assembly/GCF\\_000001635.20/](https://www.ncbi.nlm.nih.gov/assembly/GCF_000001635.20/)]. Source Data is included with this manuscript.

## Human research participants

Policy information about [studies involving human research participants and Sex and Gender in Research](#).

|                             |     |
|-----------------------------|-----|
| Reporting on sex and gender | N/A |
| Population characteristics  | N/A |
| Recruitment                 | N/A |
| Ethics oversight            | N/A |

Note that full information on the approval of the study protocol must also be provided in the manuscript.

## Field-specific reporting

Please select the one below that is the best fit for your research. If you are not sure, read the appropriate sections before making your selection.

- Life sciences     Behavioural & social sciences     Ecological, evolutionary & environmental sciences

For a reference copy of the document with all sections, see [nature.com/documents/nr-reporting-summary-flat.pdf](https://www.nature.com/documents/nr-reporting-summary-flat.pdf)

## Life sciences study design

All studies must disclose on these points even when the disclosure is negative.

|                 |                                                                                                                                                                                                                                                                                                                                                                                                                           |
|-----------------|---------------------------------------------------------------------------------------------------------------------------------------------------------------------------------------------------------------------------------------------------------------------------------------------------------------------------------------------------------------------------------------------------------------------------|
| Sample size     | Sample size was determined using power analysis.                                                                                                                                                                                                                                                                                                                                                                          |
| Data exclusions | no data exclusions were made.                                                                                                                                                                                                                                                                                                                                                                                             |
| Replication     | Due to restrictions in sample availability, only 1 replicate of cells pooled from 6 mice per genotype was used for ChIP-seq experiments. bulk RNA-seq, snRNA-seq, and TEM imaging were done with 3 biological replicates. Some experiments using Cre mouse lines were done with n's of 4 due to mouse availability. All other experiments were done with 5 biological replicates. Data were consistent across replicates. |
| Randomization   | Mice were genotyped prior to being randomly assigned to a treatment group.                                                                                                                                                                                                                                                                                                                                                |
| Blinding        | Mouse studies were carried out by a single individual and were therefore not blinded. Because of this, unbiased pipelines were used whenever possible during data analysis (e.g. CellProfiler).                                                                                                                                                                                                                           |

## Reporting for specific materials, systems and methods

We require information from authors about some types of materials, experimental systems and methods used in many studies. Here, indicate whether each material, system or method listed is relevant to your study. If you are not sure if a list item applies to your research, read the appropriate section before selecting a response.

## Materials &amp; experimental systems

|                                     |                                                                 |
|-------------------------------------|-----------------------------------------------------------------|
| n/a                                 | Included in the study                                           |
| <input type="checkbox"/>            | <input checked="" type="checkbox"/> Antibodies                  |
| <input checked="" type="checkbox"/> | <input type="checkbox"/> Eukaryotic cell lines                  |
| <input checked="" type="checkbox"/> | <input type="checkbox"/> Palaeontology and archaeology          |
| <input type="checkbox"/>            | <input checked="" type="checkbox"/> Animals and other organisms |
| <input checked="" type="checkbox"/> | <input type="checkbox"/> Clinical data                          |
| <input checked="" type="checkbox"/> | <input type="checkbox"/> Dual use research of concern           |

## Methods

|                                     |                                                 |
|-------------------------------------|-------------------------------------------------|
| n/a                                 | Included in the study                           |
| <input type="checkbox"/>            | <input checked="" type="checkbox"/> ChIP-seq    |
| <input checked="" type="checkbox"/> | <input type="checkbox"/> Flow cytometry         |
| <input checked="" type="checkbox"/> | <input type="checkbox"/> MRI-based neuroimaging |

## Antibodies

|                 |                                                                                                                                                                                                                                                                                                                                                                                                                                                                                                                                                                                                                                                                                                                                                                                                                                                                                                                                                                                                                                                                                                                                                                                                                                                                                                                                                                                                                                                                                                   |
|-----------------|---------------------------------------------------------------------------------------------------------------------------------------------------------------------------------------------------------------------------------------------------------------------------------------------------------------------------------------------------------------------------------------------------------------------------------------------------------------------------------------------------------------------------------------------------------------------------------------------------------------------------------------------------------------------------------------------------------------------------------------------------------------------------------------------------------------------------------------------------------------------------------------------------------------------------------------------------------------------------------------------------------------------------------------------------------------------------------------------------------------------------------------------------------------------------------------------------------------------------------------------------------------------------------------------------------------------------------------------------------------------------------------------------------------------------------------------------------------------------------------------------|
| Antibodies used | <p>The following primary antibodies (antigen [clone], dilution, vendor, cat. no.) were used for these studies: NPC1 [EPR5209], 1:500, Abcam, ab134113; NeuN [A60], 1:500, MilliporeSigma, MAB377; Ki67 [polyclonal], 1:200, Abcam, ab15580; Vinculin [hVIN-1], 1:2000, MilliporeSigma, V9131; Neurofilament [N52], 1:500, MilliporeSigma, MAB5266; H3K27me3 [C36B11], 1:200 [IF], 1:1000 [WB], Cell Signaling Technologies, 9733S; H3K9me3 [D4W1U], 1:200 [IF], 1:1000 [WB], Cell Signaling Technologies, 13969S; Histone H3 [96C10], 1:2000, Cell Signaling Technologies, 3638S; MBP [12], 1:100 [IF], 1:500 [WB], Abcam, ab7349; OLIG2 [polyclonal], 1:500 [IF], 1:1000 [WB], MilliporeSigma, AB9610; SOX10 [SP267], 1:400, Abcam, ab227680; SOX10 [A-2], 1:200, Santa Cruz Biotechnology, sc-365692; H3K27me3 [polyclonal], ActiveMotif, cat. #39155; H3K27ac [polyclonal], ActiveMotif, cat. #39133.</p> <p>The following secondary antibodies (antigen, dilution, vendor, cat. no.) were used: goat anti-rabbit IgG (H+L)-HRP conjugate, 1:2000, Bio-Rad, 1706515; goat anti-mouse IgG (H+L)-HRP conjugate, 1:2000, Bio-Rad, 1706516; anti-rat IgG HRP conjugated, 1:2000, R&amp;D Systems, HAF005; Alexa Fluor 488 goat anti-rat IgG (H+L), 1:500, Invitrogen, A11006; Alexa Fluor 594 goat anti-rat IgG (H+L), 1:500, Invitrogen, A11007; Alexa Fluor 594 goat anti-mouse IgG (H+L), 1:500, Invitrogen, A11032; Alexa Fluor 488 goat anti-rabbit IgG (H+L), 1:500, Invitrogen, A11008.</p> |
| Validation      | All antibodies are commercially available and have been validated by their manufacturer for use in western blot, ChIP, immunohistochemistry, and/or immunocytochemistry. Our lab has run western blots with the antibodies to confirm band sizes appear at the proper sizes. Cell knockout validation was done when available.                                                                                                                                                                                                                                                                                                                                                                                                                                                                                                                                                                                                                                                                                                                                                                                                                                                                                                                                                                                                                                                                                                                                                                    |

## Animals and other research organisms

Policy information about [studies involving animals](#); [ARRIVE guidelines](#) recommended for reporting animal research, and [Sex and Gender in Research](#)

|                         |                                                                                                                                                                                                                                                                                                                                                                                                                                             |
|-------------------------|---------------------------------------------------------------------------------------------------------------------------------------------------------------------------------------------------------------------------------------------------------------------------------------------------------------------------------------------------------------------------------------------------------------------------------------------|
| Laboratory animals      | Mice ( <i>mus musculus</i> ) used in this study were a F1 hybrid resulting from a cross of C57BL6/J and BALB/cJ strains. These mice were used at ages P6, P9, and P16. <i>Smpd1</i> <sup>-/-</sup> mice were maintained on the C57BL6/J background. <i>Smpd1</i> <sup>-/-</sup> mice were used at P16. <i>Npc1</i> flox/flox, <i>Olig2</i> -Cre, and <i>Syn1</i> -Cre mice were also maintained on the C57BL6/J background and used at P16. |
| Wild animals            | No wild animals were used in this study.                                                                                                                                                                                                                                                                                                                                                                                                    |
| Reporting on sex        | approximately equal numbers of male and female mice were used, as neurological symptoms has been reported in both sexes in this model.                                                                                                                                                                                                                                                                                                      |
| Field-collected samples | No field-collected samples were used in this study.                                                                                                                                                                                                                                                                                                                                                                                         |
| Ethics oversight        | All animal procedures were approved by the University of Michigan Committee on the Use and Care of Animals (PRO00010017)                                                                                                                                                                                                                                                                                                                    |

Note that full information on the approval of the study protocol must also be provided in the manuscript.

## ChIP-seq

## Data deposition

- Confirm that both raw and final processed data have been deposited in a public database such as [GEO](#).
- Confirm that you have deposited or provided access to graph files (e.g. BED files) for the called peaks.

|                                                                    |                                                                                                                                                                                                                                                                                                                                                                                                                                                                     |
|--------------------------------------------------------------------|---------------------------------------------------------------------------------------------------------------------------------------------------------------------------------------------------------------------------------------------------------------------------------------------------------------------------------------------------------------------------------------------------------------------------------------------------------------------|
| Data access links<br><i>May remain private before publication.</i> | To review GEO accession GSE221610:<br>Go to <a href="https://www.ncbi.nlm.nih.gov/geo/query/acc.cgi?acc=GSE221610">https://www.ncbi.nlm.nih.gov/geo/query/acc.cgi?acc=GSE221610</a><br>Enter token uvavoewdjqxbuj into the box                                                                                                                                                                                                                                      |
| Files in database submission                                       | GSM6764929_3_0D46_01RQUM_WT-IV-VI_H3K27me3_mm_i23.fastq.gz; GSM6764930_4_0D47_01RQUM_NPC-IV-VI_H3K27me3_mm_i33.fastq.gz; GSM6764931_1_0D44_01RQUM_WT-IV-VI_H3K27Ac_mm_i23.fastq.gz; GSM6764932_2_0D45_01RQUM_NPC-IV-VI_H3K27Ac_mm_i25.fastq.gz; GSM6764929_3_0D46_01RQUM_WT-IV-VI_H3K27me3_mm10_i29_dmnorm_signal.bw; GSM6764930_4_0D47_01RQUM_NPC-IV-VI_H3K27me3_mm10_i33_dmnorm_signal.bw; GSM6764931_1_0D44_01RQUM_WT-IV-VI_H3K27Ac_mm10_i23_uniqnorm_signal.bw; |

GSM6764932\_2\_0D45\_01RQUM\_NPC-IV-VI\_H3K27Ac\_mm10\_i25\_uniqnorm\_signal.bw;

Genome browser session  
(e.g. [UCSC](#))

<https://tinyurl.com/2lbyodjd>

## Methodology

|                         |                                                                                                                                                                                                                                                                                                                                                                                      |
|-------------------------|--------------------------------------------------------------------------------------------------------------------------------------------------------------------------------------------------------------------------------------------------------------------------------------------------------------------------------------------------------------------------------------|
| Replicates              | One replicate for each genotype was used. One replicate contained cells pooled together from six mice.                                                                                                                                                                                                                                                                               |
| Sequencing depth        | (Sample name; total reads; unique reads (without duplicate reads)).<br>3_0D46_01RQUM_WT-IV-VI_H3K27me3_mm10_i29; 43,383,603; 18,720,302.<br>4_0D47_01RQUM_NPC-IV-VI_H3K27me3_mm10_i33; 42,262,438; 23,376,275.<br>1_0D44_01RQUM_WT-IV-VI_H3K27Ac_mm10_i23; 43,834,918; 16,238,937.<br>2_0D45_01RQUM_NPC-IV-VI_H3K27Ac_mm10_i25; 44,404,991; 15,309,904.<br>All reads are single-end. |
| Antibodies              | H3K27me3 (ActiveMotif, cat. #39155); H3K27ac (ActiveMotif, cat. #39133)                                                                                                                                                                                                                                                                                                              |
| Peak calling parameters | Peak calling was performed by ActiveMotif. The two main peak callers used at Active Motif are MACS/MACS2 (Zhang et al., Genome Biology 2008, 9:R137) and SICER (Zang et al., Bioinformatics 25, 1952-1958, 2009).                                                                                                                                                                    |
| Data quality            | Only reads that pass Illumina's purity filter, align with no more than 2 mismatches, and map uniquely to the genome are used in analysis. In addition, duplicate reads ("PCR duplicates") are removed.                                                                                                                                                                               |
| Software                | ChIP-seq analysis was performed by ActiveMotif. The following were used in the processing and analysis of ChIP-seq data: MACS2, SICER, ngsplot v2.61, IGV v2.15.1.                                                                                                                                                                                                                   |
